# Supplementary material for: Impact of the Severe Malaria “Champions Program” on the Management of Severe Malaria Cases in 12 Hospitals of the North and Far North Regions of Cameroon
Source: PubMed Central journal article supplement (PMC10919230; doi:10.4269/ajtmh.23-0528), 2024-02-06
Supplement: tpmd230528.SD1.pdf [file tpmd230528.SD1.pdf]

## SUPPLEMENTAL MATERIALS

### S1. Components of facility readiness checklist.

| Information                                                                                     | Score |
|-------------------------------------------------------------------------------------------------|-------|
| Does facility offer ANC services?                                                               | NS    |
| Does facility distribute LLINs to children under 5 years of age?                                | NS    |
| Does facility offer laboratory services?                                                        | NS    |
| Does facility offer diazepam?                                                                   | NS    |
| Does facility offer blood transfusion?                                                          | NS    |
| Is there at least 1 CHW attached to this facility?                                              | NS    |
| Does facility offer case management of severe malaria services?                                 | NS    |
| <b>Availability of medications</b>                                                              |       |
| Are these medications available today?                                                          |       |
| Paracetamol                                                                                     | 1     |
| Sulfadoxine-Pyrimethamine                                                                       | 2     |
| ACTs for children under 5 years                                                                 | 2     |
| ACTs for children 5-7 years                                                                     | 2     |
| ACTs for children 7-13 years                                                                    | 2     |
| ACTs for children over 13 and adults                                                            | 2     |
| Injectable Quinine                                                                              | 2     |
| Compressed Quinine                                                                              | 2     |
| Injectable Artesunate and/or IM Injectable Artemether                                           | 2     |
| Artesunate Rectocaps                                                                            | 2     |
| Iron Tablets                                                                                    | 1     |
| Diazepam                                                                                        | 1     |
| 5% Glucose                                                                                      | 2     |
| 10% Glucose                                                                                     | 1     |
| 30% Glucose                                                                                     | 1     |
| Lactate Ringer                                                                                  | 1     |
| Saline Solution                                                                                 | 1     |
| <b>Availability of commodities</b>                                                              |       |
| Are these commodities available today?                                                          |       |
| Oxygen                                                                                          | 3     |
| Drinking water at the site of ANC                                                               | 2     |
| Disposable glasses available (or consistent cleaning) for the DOT strategy of the SP during ANC | 1     |
| Examination gloves                                                                              | 2     |
| Soap or hand sanitizer gel                                                                      | 1     |
| Sharps containers                                                                               | 3     |
| Thermometer                                                                                     | 2     |
| Personal scale                                                                                  | 2     |
| Syringes                                                                                        | 2     |
| Alcohol                                                                                         | 1     |

|                                                                                                                           |    |
|---------------------------------------------------------------------------------------------------------------------------|----|
| Cotton                                                                                                                    | 1  |
| Malaria RDTs                                                                                                              | 3  |
| LLINs                                                                                                                     | 3  |
| Reagents for determining blood groups                                                                                     | 2  |
| Blood for transfusion                                                                                                     | 1  |
| <b>Availability of documentation</b>                                                                                      |    |
| Are these documents available today?                                                                                      |    |
| Records of curative consultations                                                                                         | 2  |
| Records of prenatal consultations                                                                                         | 2  |
| Records of the distribution of LLINs to children under 5 years of age                                                     | 1  |
| Records of the distribution of LLINs to pregnant women                                                                    | 1  |
| HMIS reports                                                                                                              | 2  |
| Monthly CHW reports                                                                                                       | 2  |
| Manual for filling out the data collection media                                                                          | 1  |
| <b>Availability of materials</b>                                                                                          |    |
| Are these materials (guides, job aides, etc) available today?                                                             |    |
| Malaria and pregnancy guide or tools/support on ANC                                                                       | 1  |
| ANC guidelines                                                                                                            | 1  |
| National guidelines for the management of malaria                                                                         | 2  |
| Management of uncomplicated malaria fact sheet                                                                            | 1  |
| Management of severe malaria fact sheet                                                                                   | 1  |
| Management of malaria in pregnancy fact sheet                                                                             | 1  |
| Preparation of artesunate injection PEC fact sheet                                                                        | 1  |
| LLIN distribution guidelines                                                                                              | 1  |
| <b>Availability of trained human resources</b>                                                                            |    |
| Does the health facility have at least 50% of staff trained to manage malaria cases using the latest national guidelines? | 3  |
| <b>Availability of quality data</b>                                                                                       |    |
| <b>Number of pregnant women received in ANC 1</b>                                                                         |    |
| Amount reported (R)                                                                                                       | NS |
| Amount found in the register (F)                                                                                          | NS |
| Difference (F-R) <= 10%                                                                                                   | 1  |
| <b>Number of pregnant women who received IPT 3</b>                                                                        |    |
| Amount reported (R)                                                                                                       | NS |
| Amount found in the register (F)                                                                                          | NS |
| Difference (F-R) <= 10%                                                                                                   | 1  |
| <b>Number of suspected malaria cases registered in the health facility</b>                                                |    |
| Amount reported (R)                                                                                                       | NS |
| Amount found in the register (F)                                                                                          | NS |
| Difference (F-R) <= 10%                                                                                                   | 1  |
| <b>Number of suspected malaria cases tested by RDT or thick smear test</b>                                                |    |
| Amount reported (R)                                                                                                       | NS |
| Amount found in the register (F)                                                                                          | NS |

|                                                                                      |    |
|--------------------------------------------------------------------------------------|----|
| Difference (F-R) <= 10%                                                              | 1  |
| <b>Number of uncomplicated malaria cases tested by RDT or thick smear test</b>       |    |
| Amount reported (R)                                                                  | NS |
| Amount found in the register (F)                                                     | NS |
| Difference (F-R) <= 10%                                                              | 1  |
| <b>Number of confirmed uncomplicated malaria cases treated with ACTs</b>             |    |
| Amount reported (R)                                                                  | NS |
| Amount found in the register (F)                                                     | NS |
| Difference (F-R) <= 10%                                                              | 1  |
| <b>Number of ACT treatments consumed (taken from the health facility's pharmacy)</b> |    |
| Amount reported (R)                                                                  | NS |
| Amount found in the register (F)                                                     | NS |
| Difference (F-R) <= 10%                                                              | 1  |

## S2. Components of inpatient severe malaria checklist.

| <b>Collecting historical patient information</b>                                                                                                                                                                                                                                    | <b>Score</b> |
|-------------------------------------------------------------------------------------------------------------------------------------------------------------------------------------------------------------------------------------------------------------------------------------|--------------|
| Did the provider record the patient's age?                                                                                                                                                                                                                                          | 1            |
| Is the patient over 12 years old?                                                                                                                                                                                                                                                   | NS           |
| Is the patient a woman of childbearing age?                                                                                                                                                                                                                                         | NS           |
| Did the provider record where the patient lived?                                                                                                                                                                                                                                    | 1            |
| Did the provider record whether the patient was referred from a peripheral facility or not?                                                                                                                                                                                         | 1            |
| Was the patient referred?                                                                                                                                                                                                                                                           | NS           |
| If the patient was referred, has the patient received pre-transfer treatment in accordance with national guidelines noted in the register?                                                                                                                                          | 1            |
| If the patient is a woman of childbearing age, has her pregnancy status been verified?                                                                                                                                                                                              | 2            |
| If the patient is pregnant, what is the determined gestational age?                                                                                                                                                                                                                 | NS           |
| <b>Patient Assessment</b>                                                                                                                                                                                                                                                           |              |
| Did the provider take the patient's temperature?                                                                                                                                                                                                                                    | 2            |
| Did the provider measure the patient's weight?                                                                                                                                                                                                                                      | 2            |
| Did the provider take the patient's blood pressure?                                                                                                                                                                                                                                 | 2            |
| Did the provider take the patient's pulse?                                                                                                                                                                                                                                          | 2            |
| Did the provider take the patient's respiratory rate?                                                                                                                                                                                                                               | 2            |
| Were signs of severe malaria found in the patient (behavioral changes, convulsions, decreased urine output or dark urine, spontaneous bleeding, prostration/generalized weakness, inability to drink, respiratory distress, jaundice, altered consciousness) noted in the register? | 2            |
| Did the provider record the information collected during the complete physical examination of the patient (eyes, conjunctivae, fundus, palms, ears, throat, neck, heart, lungs, abdomen, and reflex)?                                                                               | 1            |
| Has the provider confirmed the diagnosis of severe malaria based on the positivity of the GE/FS blood smear or RDT biological test?                                                                                                                                                 | 2            |
| Was microscopy performed?                                                                                                                                                                                                                                                           | NS           |
| If microscopy was performed, was the parasite density specified?                                                                                                                                                                                                                    | 1            |
| Has the provider ordered a Complete Blood Count (CBC) or hemoglobin (Hb) count to confirm severe anemia in the patient?                                                                                                                                                             | 3            |
| Did the provider request a Blood Glucose test to confirm hypoglycemia in the patient?                                                                                                                                                                                               | 3            |
| Did the provider request Uremia and Creatinine tests to confirm renal failure in the patient?                                                                                                                                                                                       | 2            |
| Has the provider performed a urine dipstick test for hemoglobinuria?                                                                                                                                                                                                                | 2            |
| Did the provider request a blood gas test to confirm metabolic acidosis in the patient?                                                                                                                                                                                             | 1            |
| Did the provider note the results of the biological tests requested in the registry?                                                                                                                                                                                                | 1            |
| <b>Providing the right treatment</b>                                                                                                                                                                                                                                                |              |
| Did the provider use artesunate injection to treat severe malaria?                                                                                                                                                                                                                  | 3            |
| If Yes, has the provider correctly calculated the amount of artesunate required based on the patient's weight?                                                                                                                                                                      | 3            |
| Did the provider follow the procedures for the preparation of the artesunate injection?                                                                                                                                                                                             | 3            |
| Check that the provider follows the procedure for the preparation of the artesunate                                                                                                                                                                                                 | NS           |

|                                                                                                                                                    |    |
|----------------------------------------------------------------------------------------------------------------------------------------------------|----|
| injection                                                                                                                                          |    |
| i- Removed and injected the entire contents (1 ml) of the sodium bicarbonate ampoule into the artesunate powder vial                               | NS |
| ii- shook gently until dissolved and a clear reconstituted solution was obtained                                                                   | NS |
| iii- removed and injected the required volume of 5% saline or dextrose solution (depending on IV or IM) into the reconstituted artesunate solution | NS |
| Did the provider administer a weight-appropriate dose of artesunate based on IV or IM route?                                                       | 3  |
| Has the provider properly defined the time interval between doses to be injected into the patient for each day?                                    | 2  |
| Did the provider give the patient an antipyretic to treat the fever?                                                                               | 1  |
| Did provider use an artemether injection to treat severe malaria?                                                                                  | NS |
| If the provider has used an artemether injection to treat severe malaria, is the dosage according to the guidelines?                               | 3  |
| Did provider use a quinine injection to treat severe malaria?                                                                                      | NS |
| If the provider has used a quinine injection to treat severe malaria, is the dosage correct?                                                       | 3  |
| Did the provider adhere to the time limit of four hours or more to infuse the quinine salt?                                                        | 2  |
| Did the patient receive antimalarial relay treatment after the emergency passed?                                                                   | 2  |
| If yes, does the relay treatment used comply with national guidelines?                                                                             | 2  |
| Does the provider carry out regular parasitological monitoring through testing the GE and parasite density?                                        | 1  |
| <b>Management of Altered Consciousness</b>                                                                                                         |    |
| Is the patient experiencing altered consciousness/ coma?                                                                                           | NS |
| Has the patient received appropriate nursing care (aspiration, clearing of airways, mobilization in bed and lying down if necessary, etc.)?        | 3  |
| Is the patient's progress assessed regularly (vital signs, level of consciousness, Glasgow scale, glucose, Hb)?                                    | 3  |
| Did patient have a seizure?                                                                                                                        | NS |
| If the patient had a seizure, did the provider administer diazepam?                                                                                | 3  |
| <b>Management of Severe Anemia</b>                                                                                                                 |    |
| Does the patient have severe anemia?                                                                                                               | NS |
| Is the decision to prescribe or provide a blood transfusion appropriate?                                                                           | 3  |
| Has the provider calculated the amount of blood to be administered according to standards?                                                         | 3  |
| Has the provider determined the patient's blood type and rhesus?                                                                                   | 3  |
| Has the provider completed the pre-transfusion compatibility test?                                                                                 | 3  |
| Does the provider plan to check the hemoglobin level regularly?                                                                                    | 3  |
| <b>Management of Hypoglycemia</b>                                                                                                                  |    |
| Does the patient have hypoglycemia?                                                                                                                | NS |
| Did the provider administer IV glucose (G10, G30) according to national guidelines?                                                                | 3  |
| Does the provider monitor the patient's blood sugar levels regularly?                                                                              | 3  |
| <b>Management of Metabolic Acidosis</b>                                                                                                            |    |
| Does the patient have metabolic acidosis?                                                                                                          | NS |
| Is blood gas prescribed or performed?                                                                                                              | 3  |

|                                                                                                                                        |    |
|----------------------------------------------------------------------------------------------------------------------------------------|----|
| Is oximetry used to monitor oxygen saturation?                                                                                         | 3  |
| Have appropriate measures been taken to correct acidosis (electrolyte balance, rehydration, etc.)?                                     | 3  |
| <b>Dehydration/ Hypovolemia</b>                                                                                                        |    |
| Does the patient have dehydration?                                                                                                     | NS |
| Did the patient receive sufficient IV fluids according to standards?                                                                   | 3  |
| Was the admission/discharge ratio monitored regularly until the patient stabilized?                                                    | 3  |
| <b>Other Complications</b>                                                                                                             |    |
| Does the patient have a complication other than those listed above?                                                                    | NS |
| Have appropriate measures been taken to correct other complications found in the patient (acute renal failure, pulmonary edema, etc.)? | 3  |

NS= Not scored
